# Supplementary material for: A simplified prediction model for end-stage kidney disease in patients with diabetes
Source: PubMed Central journal article supplement (PMC9304378; doi:10.1038/s41598-022-16451-5), 2022-07-21

## Online-Only Supplementary Material

### Table of Contents

|                 |      |
|-----------------|------|
| Table S1 .....  | p. 2 |
| Table S2 .....  | p. 3 |
| Figure S1 ..... | p. 4 |

**Table S1. Relative importance of variables for predicting end-stage kidney disease (ESKD) using the random forest model and the Cox proportional hazard model (multiple imputation method)**

| <b>Random forest model</b>           |                            |               |                |
|--------------------------------------|----------------------------|---------------|----------------|
| <b>C-statistic 0.905</b>             |                            |               |                |
| <b>Upper 12 variables</b>            | <b>Relative importance</b> |               |                |
| eGFR                                 | 0.098                      |               |                |
| Serum albumin                        | 0.024                      |               |                |
| HbA1c                                | 0.019                      |               |                |
| Proteinuria, positive                | 0.017                      |               |                |
| Serum uric acid                      | 0.008                      |               |                |
| Serum bilirubin                      | 0.007                      |               |                |
| Red blood cell count                 | 0.005                      |               |                |
| ARB use                              | 0.004                      |               |                |
| Age                                  | 0.002                      |               |                |
| Body mass index                      | 0.001                      |               |                |
| Hypertension, positive               | 0.001                      |               |                |
| Thrombocyte count                    | 0.000                      |               |                |
| <b>Cox proportional hazard model</b> |                            |               |                |
| <b>C-statistic 0.905</b>             |                            |               |                |
| <b>Upper 12 variables</b>            | <b>HR</b>                  | <b>95% CI</b> | <b>P value</b> |
| eGFR                                 | 0.245                      | 0.195-0.308   | <0.001         |
| Serum bilirubin                      | 0.557                      | 0.417-0.744   | <0.001         |
| HbA1c                                | 1.736                      | 1.513-1.993   | <0.001         |
| Serum albumin                        | 0.609                      | 0.514-0.720   | <0.001         |
| Proteinuria, positive                | 1.624                      | 1.291-2.043   | <0.001         |
| Age                                  | 0.707                      | 0.591-0.846   | <0.001         |
| Serum uric acid                      | 1.258                      | 1.051-1.506   | 0.012          |
| ARB use                              | 1.228                      | 1.013-1.490   | 0.037          |
| GLP-1R agonist use                   | 0.816                      | 0.682-0.977   | 0.027          |
| Gender, men                          | 1.156                      | 0.967-1.382   | 0.113          |
| Hypertension, positive               | 0.883                      | 0.672-1.161   | 0.374          |
| Body mass index                      | 0.887                      | 0.735-1.071   | 0.213          |

\* P<0.05. ARB, angiotensin II receptor blocker; GLP-1R, glucagon-like peptide 1 receptor.

**Table S2. Characteristics of the subjects in the external validation cohort compared with those in the development cohort**

| <b>Variables</b>                                              | <b>Validation cohort</b> | <b>Development cohort</b> | <b>P value</b>      |
|---------------------------------------------------------------|--------------------------|---------------------------|---------------------|
| n                                                             | 5153                     | 2549                      |                     |
| Age, years, median (IQR)                                      | 48.0(42.0-54.0)          | 57.0 (47.0-63.0)          | <0.001 <sup>a</sup> |
| Gender, male, n (%)                                           | 4622 (89.7)              | 1432 (56.2)               | <0.001 <sup>b</sup> |
| HbA1c, %, median (IQR)                                        | 6.9 (6.4-7.9)            | 7.0 (6.5-8.1)             | 0.0831 <sup>a</sup> |
| mmol/mol, median (IQR)                                        | 50.4 (45.3-60.6)         | 51.4 (46.3-62.6)          | 0.0831 <sup>a</sup> |
| Serum albumin, mg/dL, mean (SD)                               | 4.5 (0.4)                | 4.0 (0.5)                 | <0.001 <sup>c</sup> |
| Serum bilirubin, mg/dL, median (IQR)                          | 0.7 (0.6-1.0)            | 0.7 (0.5-0.9)             | <0.001 <sup>a</sup> |
| eGFR, mL min <sup>-1</sup> [1.73 m] <sup>-2</sup> , mean (SD) | 80.6 (20.5)              | 81.8 (26.6)               | 0.0345 <sup>c</sup> |
| Proteinuria, n (%)                                            |                          |                           |                     |
| Positive,                                                     | 984 (19.1)               | 475 (29.7)                | 0.6492 <sup>b</sup> |
| Missing, n (%)                                                | 0                        | 948 (37.2)                |                     |
| Follow-up time, years,                                        |                          |                           |                     |
| Median (IQR)                                                  | 4.0 (3.9-4.6)            | 4.7 (2.3-8.8)             | <0.001 <sup>a</sup> |
| Mean (SD)                                                     | 4.3 (1.8)                | 5.6 (3.7)                 | <0.001 <sup>c</sup> |
| ESKD, n (%)                                                   | 157 (3.1)                | 176 (6.2)                 | <0.001 <sup>c</sup> |
| Time to ESKD, years,                                          |                          |                           |                     |
| Median (IQR)                                                  | 3.1 (1.6-4.5)            | 2.5 (0.9-4.8)             | <0.001 <sup>a</sup> |
| Mean (SD)                                                     | 3.4 (2.2)                | 3.2 (2.9)                 | <0.001 <sup>c</sup> |

a Calculated by Mann Whitney test, b Calculated by c2 test, c Calculated by t test. ESRD, end-stage kidney disease. Abbreviation: eGFR, estimated glomerular filtration rate; HbA1c, hemoglobin A1c.

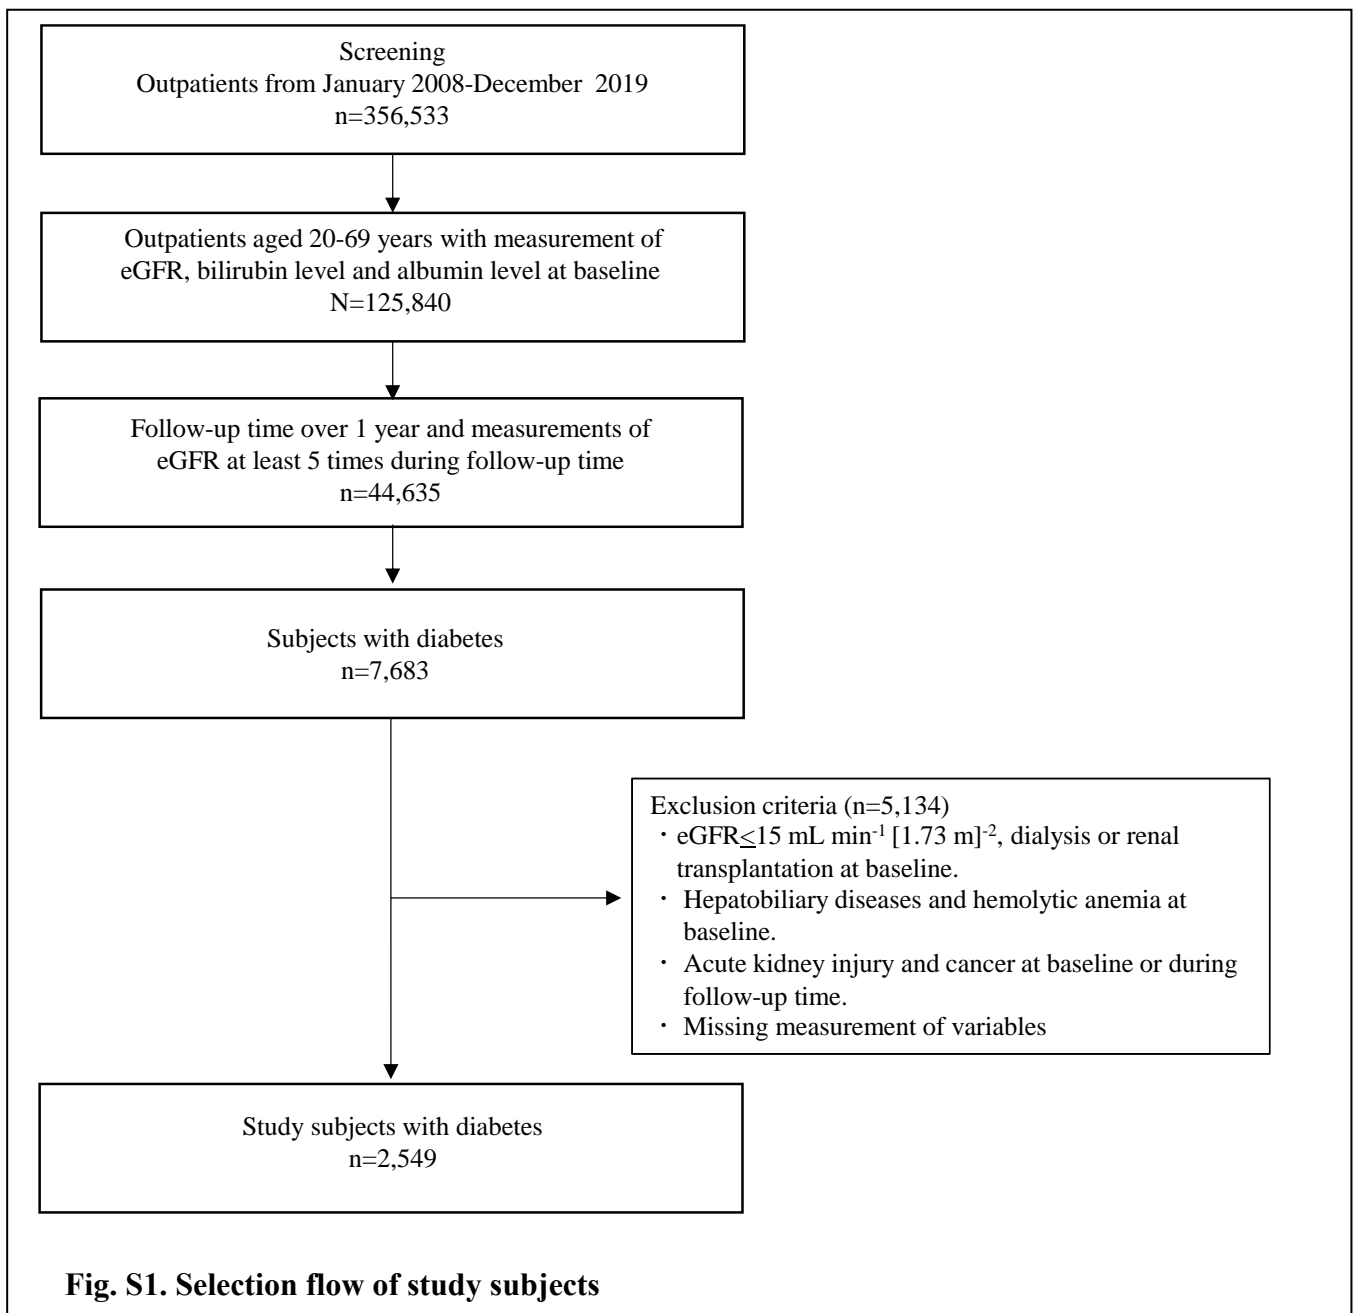

Supplement: 41598_2022_16451_MOESM1_ESM.pdf [file 41598_2022_16451_MOESM1_ESM.pdf]
